# Supplementary figures and images for: A titin missense variant drives atrial electrical remodeling and is associated with atrial fibrillation
Source: eLife journal article supplement (doi:10.7554/elife.104719), 2025-03-17

# FHL2-MinK CO-IP

MinK

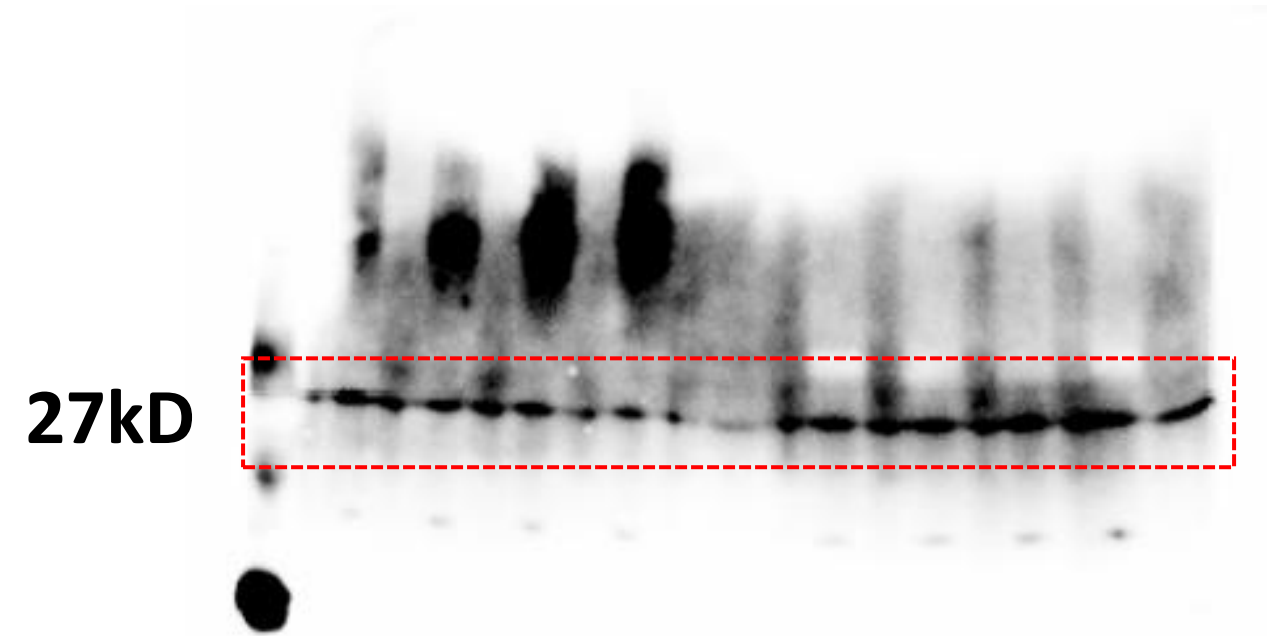

FHL2

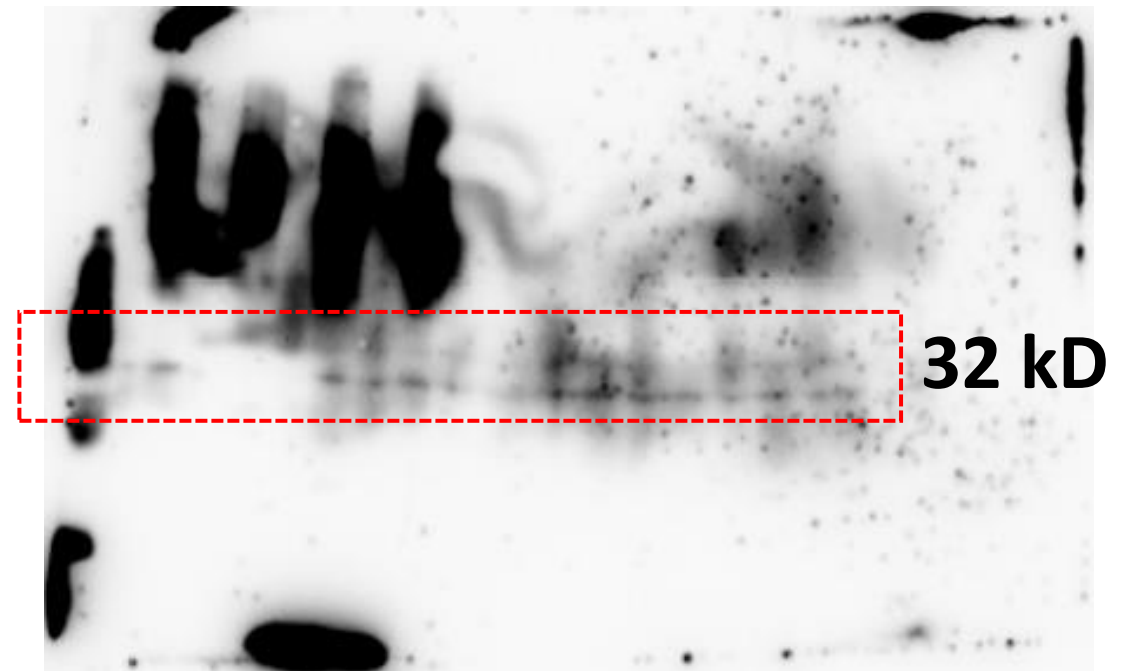

Supplement: fig5-data2 [file Western blot CO-IP raw images.pdf › Western blot CO-IP raw images.pdf]
